# Supplementary material for: Physical Activity during the COVID-19 Pandemic in the UK: A Qualitative Analysis of Free-Text Survey Data
Source: MDPI journal article supplement (doi:10.3390/ijerph192214784), 2022-11-10
Supplement: s1 [file s1]

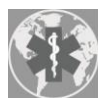

## Supplementary information

**Table S1.** Timeline of COVID-19 restrictions in England 2020 [50], [51].

| Date                                 | COVID-19 restriction                                                                                                                                                                                  |
|--------------------------------------|-------------------------------------------------------------------------------------------------------------------------------------------------------------------------------------------------------|
| Mid-March to mid-May (Full lockdown) | National restrictions (lockdown 1). Sports facilities closed, restrictions applied to all indoor activity and organised outdoor activity. Single daily allowance of activity allowed.                 |
| Mid-May                              | Unlimited outdoor exercise is permitted. Meeting one person outside your household outdoors allowed. Activity choice extended to include water sports                                                 |
| June                                 | Schools reopened (year 1 to year 6). Groups of 6 people allowed to meet outdoors (rule of 6). Indoor gatherings of two people from different households permitted. Outdoor training sessions allowed. |
| Early July                           | Local Lockdown regulations introduced and used                                                                                                                                                        |
| Mid-July                             | Playgrounds & outdoor pools reopened. Organised sports restarted                                                                                                                                      |
| End- July                            | Gyms, indoor pools & leisure centres reopened                                                                                                                                                         |
| Sept                                 | Schools reopened to all age groups                                                                                                                                                                    |
| Mid-Sept to Oct*                     | Restrictions reintroduced for indoor team sports. Reintroduction of maximum of 6 people allowed to meet outdoors (rule of 6)                                                                          |
| November                             | National restrictions (lockdown 2). Restrictions applied to all indoor activity and organised outdoor activity                                                                                        |
| December                             | New tiered system of restrictions based on location                                                                                                                                                   |

\*Wales had an additional ‘fire-break’ lockdown 23/10/20 and 09/11/20.

**Table S2.** Physical activity words.

| Letter | Physical activity related word                                                                                                                                                                                                                                                                 |
|--------|------------------------------------------------------------------------------------------------------------------------------------------------------------------------------------------------------------------------------------------------------------------------------------------------|
| A      | activities act4ivity activates active active_ actively actives activiites activites activities activities                                                                                                                                                                                      |
| B      | badminton ball ballet ballets ballroom balls basketball bicycle bicycles bike bikes biking bikr boat boating bodybuilder bodyweight bowling bowls breathlessness brisk briskly                                                                                                                 |
| C      | canoe canoeing cardiac cardiac cardio chi class classes club clubs club's coach coached coaches coaching competing competition competitions competitive competitively competitiveness couch2 courts cricket crossfit crosstrainer curcuit curling cycle cycled cycles cycling cyclist cyclists |
| D      | dance dancefit danceing dancer dancers dances dancesing dancing diving dogwalkers dogwalking                                                                                                                                                                                                   |
| E      | ecercise endurance energetic energy excercies excercise excercises excercising                                                                                                                                                                                                                 |

|         |                                                                                                                                                                                                                                                                                                                                             |
|---------|---------------------------------------------------------------------------------------------------------------------------------------------------------------------------------------------------------------------------------------------------------------------------------------------------------------------------------------------|
|         | excerise excersise excersising excersize excise excise excising excercise exercise exercis exercise.eating exercised exerciser exercises exercising exercise exercrise excersize exercise                                                                                                                                                   |
| F       | fatter fit fitbits fitbut fitness fitter fittest football footballer footballers footie footing                                                                                                                                                                                                                                             |
| G       | gardened gardener gardening garmin golf golfer golfers golfing gym gymnastics gyms gym's                                                                                                                                                                                                                                                    |
| H/I     | hike hiked hikes hiking horse horsemen horseracing horses inactive inactivity                                                                                                                                                                                                                                                               |
| J       | joe joes jog jogged jogger joggers jogging juggle juggled juggling                                                                                                                                                                                                                                                                          |
| K/L     | kayak kayaking kettlebells kick kickboxing kicked kicking lido                                                                                                                                                                                                                                                                              |
| M/O     | marathon marathons member members member's membership memberships mileage miles mountain mountaineering mountains outdoorsy                                                                                                                                                                                                                 |
| P       | padding paddle paddling padel parkrun parkruns parkrun's physical physcial physcial physical physically pilates play players playground playgrounds playing plod plodded plodding plods ponies pony pool pools powerlifting                                                                                                                 |
| R       | race races race's racing racket racketball ramble Rambler ramblers rambling riding rugby runner runners running runs                                                                                                                                                                                                                        |
| S       | scuba sculling shoot shooting shoots skate skated skating ski skiing skip skipping skips snowboarding soccer sport sportcentre sporting sports sportsmen sporty sprint sprints strava stretch stretched stretches stretching stroll strolls sweat sweating sweats sweaty swim swim2 swimmer swimmers swimmin swimming swimminh swimmg swims |
| T       | train trainer trainers training trampoline trampolining                                                                                                                                                                                                                                                                                     |
| U/V     | ultra ultras vegetate vegetating vegging                                                                                                                                                                                                                                                                                                    |
| W/Y/Z   | walker walkers walking walking.exercising walks watersports weight weightlifting weights workout workouts yoga yoga's zumba                                                                                                                                                                                                                 |
| Numbers | 10,000 10000 _outdoor 10,000s 10000s 10k 10km 11k 12k 1k 1km 20k 20km 21k 2kms 2miles 5km 5ks 5miles                                                                                                                                                                                                                                        |

Table S3. Example Excel coding.

| First order | PA        | Change    | Barrier (1)    | Barrier (2) | Facilitator (1) | Facilitator (2) | Impact   | ID   | Quote                                                                                                                                                                                              |
|-------------|-----------|-----------|----------------|-------------|-----------------|-----------------|----------|------|----------------------------------------------------------------------------------------------------------------------------------------------------------------------------------------------------|
| 1           | gardening | increase  |                |             | garden          |                 |          | 1234 | Lots of gardening has kept me going                                                                                                                                                                |
| 1           | exercise  | not clear |                |             | nature          | outdoors        | mental   | 1345 | Exercise- getting out into nature has kept me sane                                                                                                                                                 |
| 1           | walk      | same      |                |             | dog             | social contact  |          | 1456 | Having a dog is a fantastic outlet for me. From chatting to her and walking every day to meeting other dog walkers whilst out walking and I've been able to have socially distanced chat with them |
| 1           | exercise  | increase  |                |             | weather         |                 |          | 1567 | Trying to do more exercise but only achieve when weather was good                                                                                                                                  |
| 1           | exercise  | increase  |                |             | time            |                 |          | 1678 | Working from home means I don't need to spend time travelling to work. I can use this extra time for other activities such as exercise                                                             |
| 2           | walk      | decrease  | active commute |             |                 |                 | physical | 1789 | Not walking to work every day has had a big impact on my physical health – I have become a couch potato                                                                                            |

|   |               |            |                 |        |            |      |                                                                                                                                                                                                              |
|---|---------------|------------|-----------------|--------|------------|------|--------------------------------------------------------------------------------------------------------------------------------------------------------------------------------------------------------------|
| 2 | exercise      | de-crease  | time            |        |            | 2234 | My exercise is really low as I can't get out to do things with children at home                                                                                                                              |
| 2 | gym           | de-crease  | closure         |        | mental     | 2245 | Not being able to go to the gym during lockdowns had an impact on mental health                                                                                                                              |
| 2 | walk          | de-crease  | gov restriction |        | well-being | 2256 | I have had fewer opportunities to go walking with friends in the mountains which I normally do each week. This has led to reduced fitness and loneliness                                                     |
| 2 | classes       | de-crease  | covid           | safety | well-being | 2267 | I have stopped going to my exercise classes and I miss that, but when they did start up again, I didn't want to go back due to the worry of catching the virus                                               |
| 2 | walk          | de-crease  | weather         | safety |            | 2278 | I don't like going out on my own for walks and now its darker much earlier I'm not walking on an evening with my husband so rarely leave the house                                                           |
| 1 | exercise      | in-crease  |                 | health | well-being | 2289 | I have made my health a priority now so that if I did catch Covid I am in better shape to tackle it. I now exercise far more and am losing weight, this has had a positive impact on how I feel about myself |
| 1 | yo-ga/pilates | in-crease  |                 | tech   | time       | 3345 | Positive impact has been an increase in exercise as zoom has enabled me to practice yoga and Pilates at times that suit me better from my spare room                                                         |
| 3 | yo-ga/pilates | not clear  |                 | tech   |            | 3356 | I do yoga online but miss being able to do it in a studio with other people                                                                                                                                  |
| 1 | exercise      | in-creased |                 | health | mental     | 3367 | I started exercising every day during the first lockdown and although I now only do 3-4 days a week, I think it helped my mental health                                                                      |
